# Supplementary material for: Consequence of Menin Deficiency in Mouse Adipocytes Derived by In Vitro Differentiation
Source: Hindawi journal article supplement (doi:10.1155/2015/149826), 2015-01-01
Supplement: f1 [file 149826.f1.pdf]

**SUPPLEMENTARY TABLE 1: Primers used for PCR in this study (mouse)**

| <b>Gene</b>                  | <b>Forward primer</b>    | <b>Reverse primer</b>       |
|------------------------------|--------------------------|-----------------------------|
| <b>Microarray validation</b> |                          |                             |
| Airm                         | CATTATATCTATCCCTCCTTGCTC | CTGCTGATTCATGTTTGCTCTTC     |
| Apoa4                        | AATCTGCACAGGGACACAGGTA   | GTTCTACAGCCTCCTTGGCATT      |
| Bcmo1                        | ATTTGGGAGGCAGACAGAAGAC   | TTTGGCATCCAGAATGAGTAAAAA    |
| Car7                         | TTCACTGGAACGCCAAGAAGTA   | GGAGCCAGGATAGGTCCAGTAG      |
| Cd200                        | CAAGCATCACCTTCTGGAACAC   | CGCAGAGCAAGTGATGTTTAGG      |
| Cdhr2                        | AGCCCTTTGGACTTTGAGACAG   | TGCTGGTGGAGAATTCAGTGTT      |
| Cfi                          | GATTTCCCAACGAGTCTGTCCTTC | CTTTTGGAAATGTTCTGCTGTCG     |
| Clec2h                       | GCGTAGCATCAAATCCCATCT    | CCTCCTCTCGTGAGAACCAAGT      |
| Ctsq                         | TGAGACATGACTCCTGCTTTCTTC | TTTCTTCCCATATTGCTCTTCTCA    |
| Cybrd1                       | AAAAGTCCCCACATGTACAGC    | AAGAGGAGGAGTCCAGAATACACG    |
| Cyp7b1                       | CACCAGAGAACAATTGGACAGC   | CAGTGGAGGAAAGAGGGCTACA      |
| Fbln7                        | GGCAAGAAGTTTGGAAAGCAAGT  | CTGGCTGGAGCATTCACTGATA      |
| Fcgr2b                       | CTCTATCCCAAAGCCAACCAC    | CTTCCTCTGGAAGGGTTTCTCC      |
| Fga                          | GGAAGGAGAACTCGCAACACT    | AATTCAGCGATCCATCCATTCT      |
| Fxyd2                        | GGGACAGAGAATCCCTTTCGAGT  | TTCATCTTCATTGACATGCCTA      |
| Gpx7                         | ACCAGACACCAACAGGGAGATT   | TCCGTCTGGGTCCACTAGGTA       |
| Hamp                         | GCACCACCTATCTCCATCAACA   | CCACACTGGGAATTGTTACAGC      |
| Hbb-y                        | CTCATCAATGGCCTGTGGAGTA   | ACTCTCCAAAAGCAGTCAGCAC      |
| Htra3                        | GCCGATGTGGTGGAGAAGATTG   | GCAACACAGGGAGCTTTTTCTT      |
| Ltbp2                        | ATTCCAGAGAGTCCAGCAGAAGAG | TACAGTAGTCTTGGCTGGGGTGT     |
| Meg3                         | CTTCCTGTGCCATTTGCTGTTG   | TGCAACGTGTTGTGCGTGAAG       |
| Men1                         | CCTCCATCGATCTTCACACTGACT | CTGAGGCAATTCCCTTGTGATA      |
| Mirg                         | TTTCCTCGATCCTCATGAAACA   | GTCAACAGTATGGGAGGGGAAG      |
| Mpl                          | GATCACCTTGGTGACTGCTCTG   | AAGGACTTAGGGCTGCAGTGTC      |
| Nnat                         | AGGGACACAGCCCATTGCGAGAAG | CACAGGAGCACCTGATGATGACAC    |
| Pdgfrl                       | AGGGTGTGGTCTACTGCAAAGC   | CCTGAATTC AACCTCCACATCA     |
| Plagl1                       | GCTGTCAAAAATGTGGCAAGTC   | GTAGGAGATCTTGTGGGATCGTG     |
| Prl2b1                       | TCCTGGTGTCTACCTGCTTTT    | TCTTTCCCTGGGCATACTGATT      |
| Prl4a1                       | GTACCATCTGTGGGCTGAAATGT  | GGCAGTATAGTTCCCGTTTTCG      |
| Prl7b1                       | GGACACCAGTTTAGCAGCCTTT   | CATTTGCTAACACCTGATCCA       |
| Rian                         | ACCAGGTTCAAGGTCCCTCATA   | TTCTCACTGTCTTCCATTCCA       |
| Serpina1a                    | TGGTGGAGAAGTTTCTGGAAGAG  | CTTCCTCAGTGTTCTCAGGATCG     |
| Serpina1b                    | CAGAGGAGGCCAAGAAAGTGAT   | CAGTGTTCTCAGGATCGAATGG      |
| Slc7a9                       | TTCTCTGGTGACCGTATGCTA    | GATGGTTGAAAATGCCACAAAA      |
| Spp2                         | GTGTACGACTACGACCCTTCTCT  | ATGTGGTTTCTGAACACTGAACT     |
| Tac2                         | ACGTGACATGCACGACTTCTTT   | AGCAGGCACTGCTTTATG          |
| Timd2                        | GCTACGGCTCTCTCCTAACTGG   | CCACCAAGGTGTGTCGAATAAATA    |
| Tmem27                       | TCCATGAGAAAAGTTCCCAACA   | GCACTGTTGATCCGGTTCTAT       |
| Tnmd                         | TCCTGGCCTTAACTCTAATTGTCC | GTCATGGACTIONTCCAATGTTTCATC |
| Ube1y1                       | AGGCTTGTTCTGGAAAGTTTATGC | CTTGCCAAGCTTCTCTTGTAGGTC    |
|                              |                          |                             |
| <b>Prolactin gene family</b> |                          |                             |
| Prl2a1                       | CTGGCAAGTCCCTCTGAACCAT   | CAGACCAGCCAGGGTAGTTCTCAT    |
| Prl2b1                       | TCCTGGTGTCTACCTGCTTTT    | TCTTTCCCTGGGCATACTGATT      |
| Prl2c1                       | GGAACAAGCCAGGCTCACACAC   | TCCGGACTGCGTTGATCTTTTT      |
| Prl2c2                       | GGAACAAGCCAGGCTCACACAC   | TCCGGACTGCGTTGATCTTTTT      |
| Prl2c3                       | TCCCATGTGTGCAATGAGGAAT   | TGCATCTCATGGGGCTTTTTGT      |
| Prl2c4                       | GAACAAGCCAGGCTCACACACT   | TCCGGACTGCGTTGATCTTTTT      |

|                     |                         |                         |
|---------------------|-------------------------|-------------------------|
| Prl2c5              | GCCCCATGAGATGCCATACTTC  | TGTCTGTGGCTTTGGAGATGATT |
| Prl3a1              | CCATGTGCTTTGACATGGAAGG  | GCAAGTGAAGTGGTGTGGCAGT  |
| Prl3b1              | CCTGGGAAGAGCCTCTGAAACA  | ACGCACCGCCATAAGGTTCTAA  |
| Prl3c1              | TGGTGTCATGCATGTTCTGTG   | GGTTTGGCACATCTTGGTGTITT |
| Prl3d1              | CCCCTGTGTCATACTGCTTCCA  | TGAAAGACAACCTCGGCACCTCA |
| Prl3d2              | TTGGAGCCTACATTGTGGTGGGA | ACACATCTGCGGCCAAGATAAAA |
| Prl3d3              | TTGGAGCCTACATTGTGGTGGGA | ACACATCTGCGGCCAAGATAAAA |
| Prl4a1              | GTACCATCTGTGGGCTGAAATGT | GGCAGTATAGTTCCCGTTTTTCG |
| Prl5a1              | GAGGTTGCCAGAAGGTCCTCAA  | CCATCGAGATCAGCCATGTTGT  |
| Prl6a1              | CTAAGGAGGGAGCCCGACAGAT  | CTGCAAGGATGCCAGTTCATTC  |
| Prl7a1              | TGCCACACTTTGCCACTCAAAT  | GGCGCCCCTGGCATACTCTT    |
| Prl7a2              | CAGGCTGTGCCAGAACTCTTCA  | ATGTCTTGCGCAGTTCATGTT   |
| Prl7b1              | GGACACCAGTTTAGCAGCCTTT  | CATTTGCTAACACCTGATCCA   |
| Prl7c1              | CAACAGCTGCCACACATTTTCC  | TCCTGATGGCGTTGGCTCTTAT  |
| Prl7d1              | AGGCTTTCAACAGCTGCCACAC  | ATAAGGGCATTCTGGCAAAGCA  |
| Prl8a1              | GTGCCATGAATGATGTCCCTGA  | CACACGAAGGCAATGGGAAAGGT |
| Prl8a2              | GGGAGAAAGCTGCATCAATTCTT | GCTCTGAGAACCTCCTCATCACG |
| Prl8a6              | TTTTGTGGGTTTCTGGATCAGC  | CCCAGTGGGGAAATTCTTCTGTC |
| Prl8a8              | CCCACGGATGGAAACATTTGAC  | AACAATCTCATCCCGCCGAAC   |
| Prl8a9              | TGGAACCCTCTCGTGGAACAT   | TGCATGCTCAGTTCCTATCA    |
|                     |                         |                         |
| <b>Adipogenesis</b> |                         |                         |
| Adipoq              | GTTGCAAGCTCTCCTGTTCC    | GCTTCTCCAGGCTCTCCTTT    |
| Gapdh               | ATCACTGCCACCCAGAAGAC    | CAACCTGGTCCTCAGTGTAG    |
| Men1                | GTACATGCGCTGCGACCGTAAG  | TCATCCTGGTAGTAGGTCTTAG  |
| Pgc1 $\alpha$       | CGGTCTTAGCACTCAGAACC    | AAGCTCTGAGCAGGGACGTC    |
| Pppary              | CCCTGGCAAAGCATTGTAT     | AATCCTTGGCCCTCTGAGAT    |
